# Supplementary material
Source: publisher site journal article supplement (https://www.dovepress.com/article/370598)
Supplement: Supplementary file 1 [file get_supplementary_file.php]

**Appendix**

***School music context***

| Variables | Items | Scoring |
| --- | --- | --- |
| 1. School musical activities | Has your school ever held the following art activities? | no = 0; yes = 1 |
| Singing activities |  |
| Instrumental activities |  |
| Theatrical activities |  |
| 2. School musical classroom | Is there a music classroom in your school? | no = 0; yes = 1 |
| 3. School musical broadcasting | Does your school have musical broadcasting (e.g., songs) every day? | no = 0; yes = 1 |
| 4. School musical teachers | Is there a music teacher in your school? | no = 0; yes = 1 |

***Psychological process***

| Variables | Items | Scoring |
| --- | --- | --- |
| 1. Music interest | 1.1 Do you like music lesson? | strongly dislike =1 ~ strongly like =5 |
| 1.2 Do you like music? | strongly dislike =1 ~ strongly like =5 |
| 1.3 How long did you attend music extracurricular activities last week? |  |
| 1.4 Can the school music class satisfy your interest in art? |  |
| 1.5 How often do you do things related to music？ |  |
| 2. Music value | 2.1 Music gave me a stage to show my artistic talents. | no = 0; yes = 1 |
| 2.2 Music let me learn more art knowledge. |
| 2.3 Music gives me more opportunities to know my classmates / friends and play / communicate with them. |
| 2.4 Music gives me access to more musical instruments. |
| 2.5 Music allows me to learn more songs. |
| 2.6 Music is useful for me to go to a good university. |
| 2.7 Music can make me feel happier. |

***Music career choice outcomes***

| Music career choice | Do you plan to engage in music related careers in the future (e.g., music teacher, musician and singer)? | don’t select = 0; possible select = 1; must select = 2 |
| --- | --- | --- |
